# Supplementary material for: Prostatic Inflammation Induces Fibrosis in a Mouse Model of Chronic Bacterial Infection
Source: PubMed Central journal article supplement (PMC4065064; doi:10.1371/journal.pone.0100770), 2014-06-20

**Saline**

**E. coli**

**Hoechst +  $\alpha$ SMA + VIM**

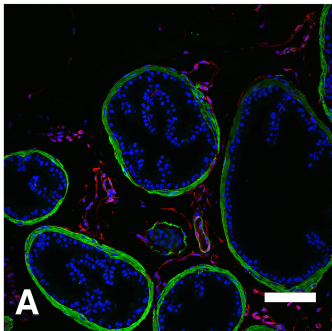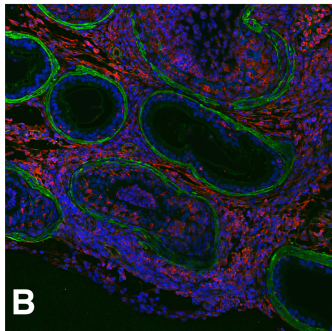

Supplement: pone.0100770.s003.pdf [file pone.0100770.s003.pdf]
